# Supplementary material for: Excess of Yra1 RNA-Binding Factor Causes Transcription-Dependent Genome Instability, Replication Impairment and Telomere Shortening
Source: PubMed Central journal article supplement (PMC4818039; doi:10.1371/journal.pgen.1005966), 2016-04-01
Supplement: pgen.1005966.s001.pdf [file pgen.1005966.s001.pdf]

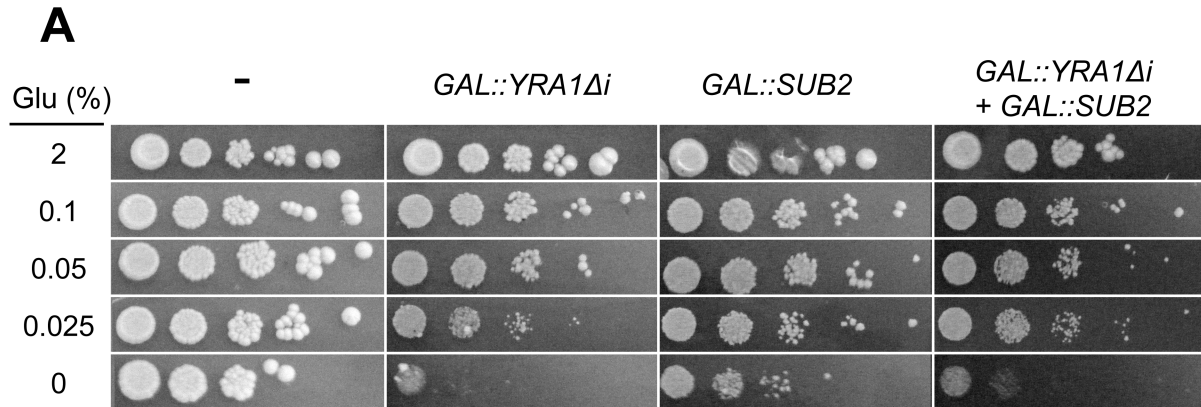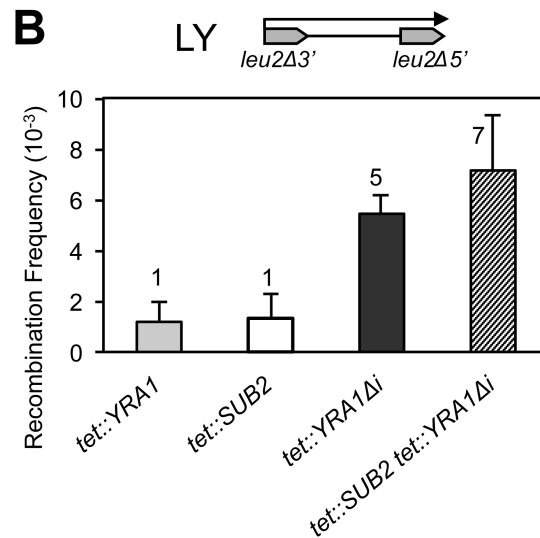

**S1 Figure (A)** Effect of *YRA1* overexpression together with or without *SUB2* overexpression. Ten-fold serial dilutions of WT cells transformed with either *GAL::YRA1Δi*, *GAL::SUB2* or *GAL::YRA1Δi* and *GAL1::SUB2* constructs and plated on minimal selective medium with 2% galactose (Gal) and different amounts of glucose (Glu). Photographs were taken after 3 days of growth at 30°C. **(B)** Recombination analysis of the plasmid-borne recombination systems LY in WT cells transformed with either *tet::YRA1*, *tet::YRA1Δi*, *tet::SUB2* or *tet::SUB2* and *tet::YRA1Δi* constructs. Gray boxes represent *LEU2* repeats. Arrows indicate the transcripts produced.
