# Supplementary material for: Excess of Yra1 RNA-Binding Factor Causes Transcription-Dependent Genome Instability, Replication Impairment and Telomere Shortening
Source: PubMed Central journal article supplement (PMC4818039; doi:10.1371/journal.pgen.1005966), 2016-04-01
Supplement: pgen.1005966.s002.pdf [file pgen.1005966.s002.pdf]

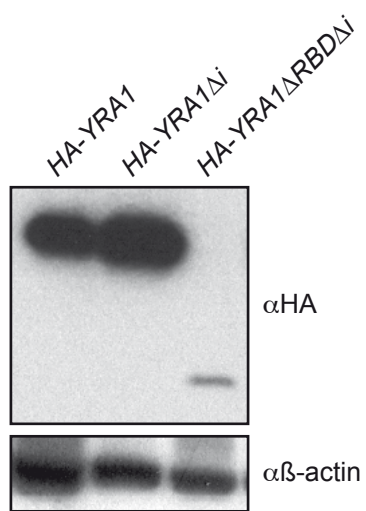

**S2 Figure.** Relative expression of HA-tagged Yra1 proteins. Western blot analysis of cells transformed with HA-YRA1, HA-YRA1Δi and HA-YRA1ΔRBDΔi constructs is plotted.
