# Supplementary material for: Excess of Yra1 RNA-Binding Factor Causes Transcription-Dependent Genome Instability, Replication Impairment and Telomere Shortening
Source: PubMed Central journal article supplement (PMC4818039; doi:10.1371/journal.pgen.1005966), 2016-04-01
Supplement: pgen.1005966.s003.pdf [file pgen.1005966.s003.pdf]

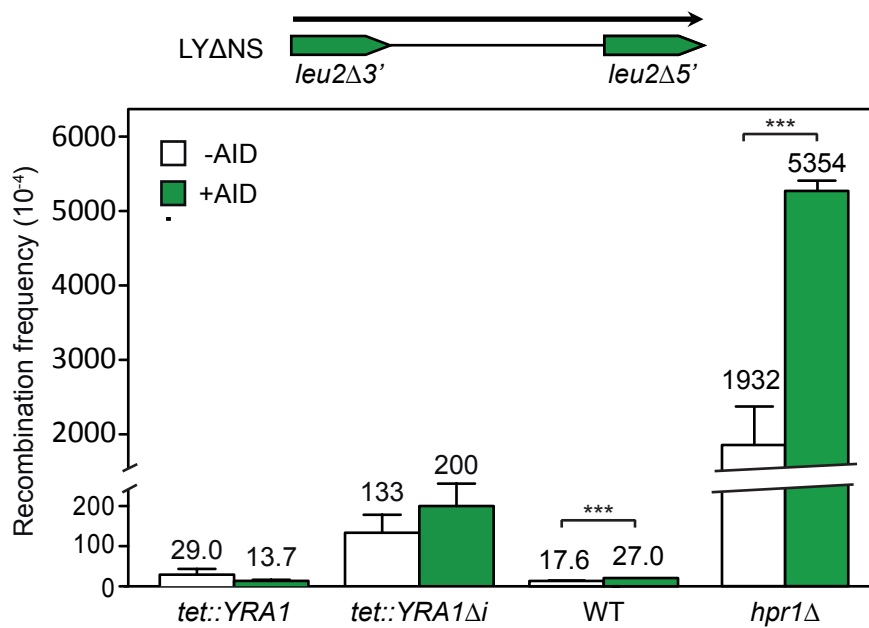

**S3 Figure.** Effect of AID overexpression on the recombination frequency of the LYΔNS system in cells transformed with *tet::YRA1* or *tet::YRA1Δi* constructs. The *hpr1Δ* mutant was included as positive control. Experiments were performed in 2% galactose to allow expression of the direct repeats.
