# Supplementary material for: Excess of Yra1 RNA-Binding Factor Causes Transcription-Dependent Genome Instability, Replication Impairment and Telomere Shortening
Source: PubMed Central journal article supplement (PMC4818039; doi:10.1371/journal.pgen.1005966), 2016-04-01
Supplement: pgen.1005966.s005.pdf [file pgen.1005966.s005.pdf]

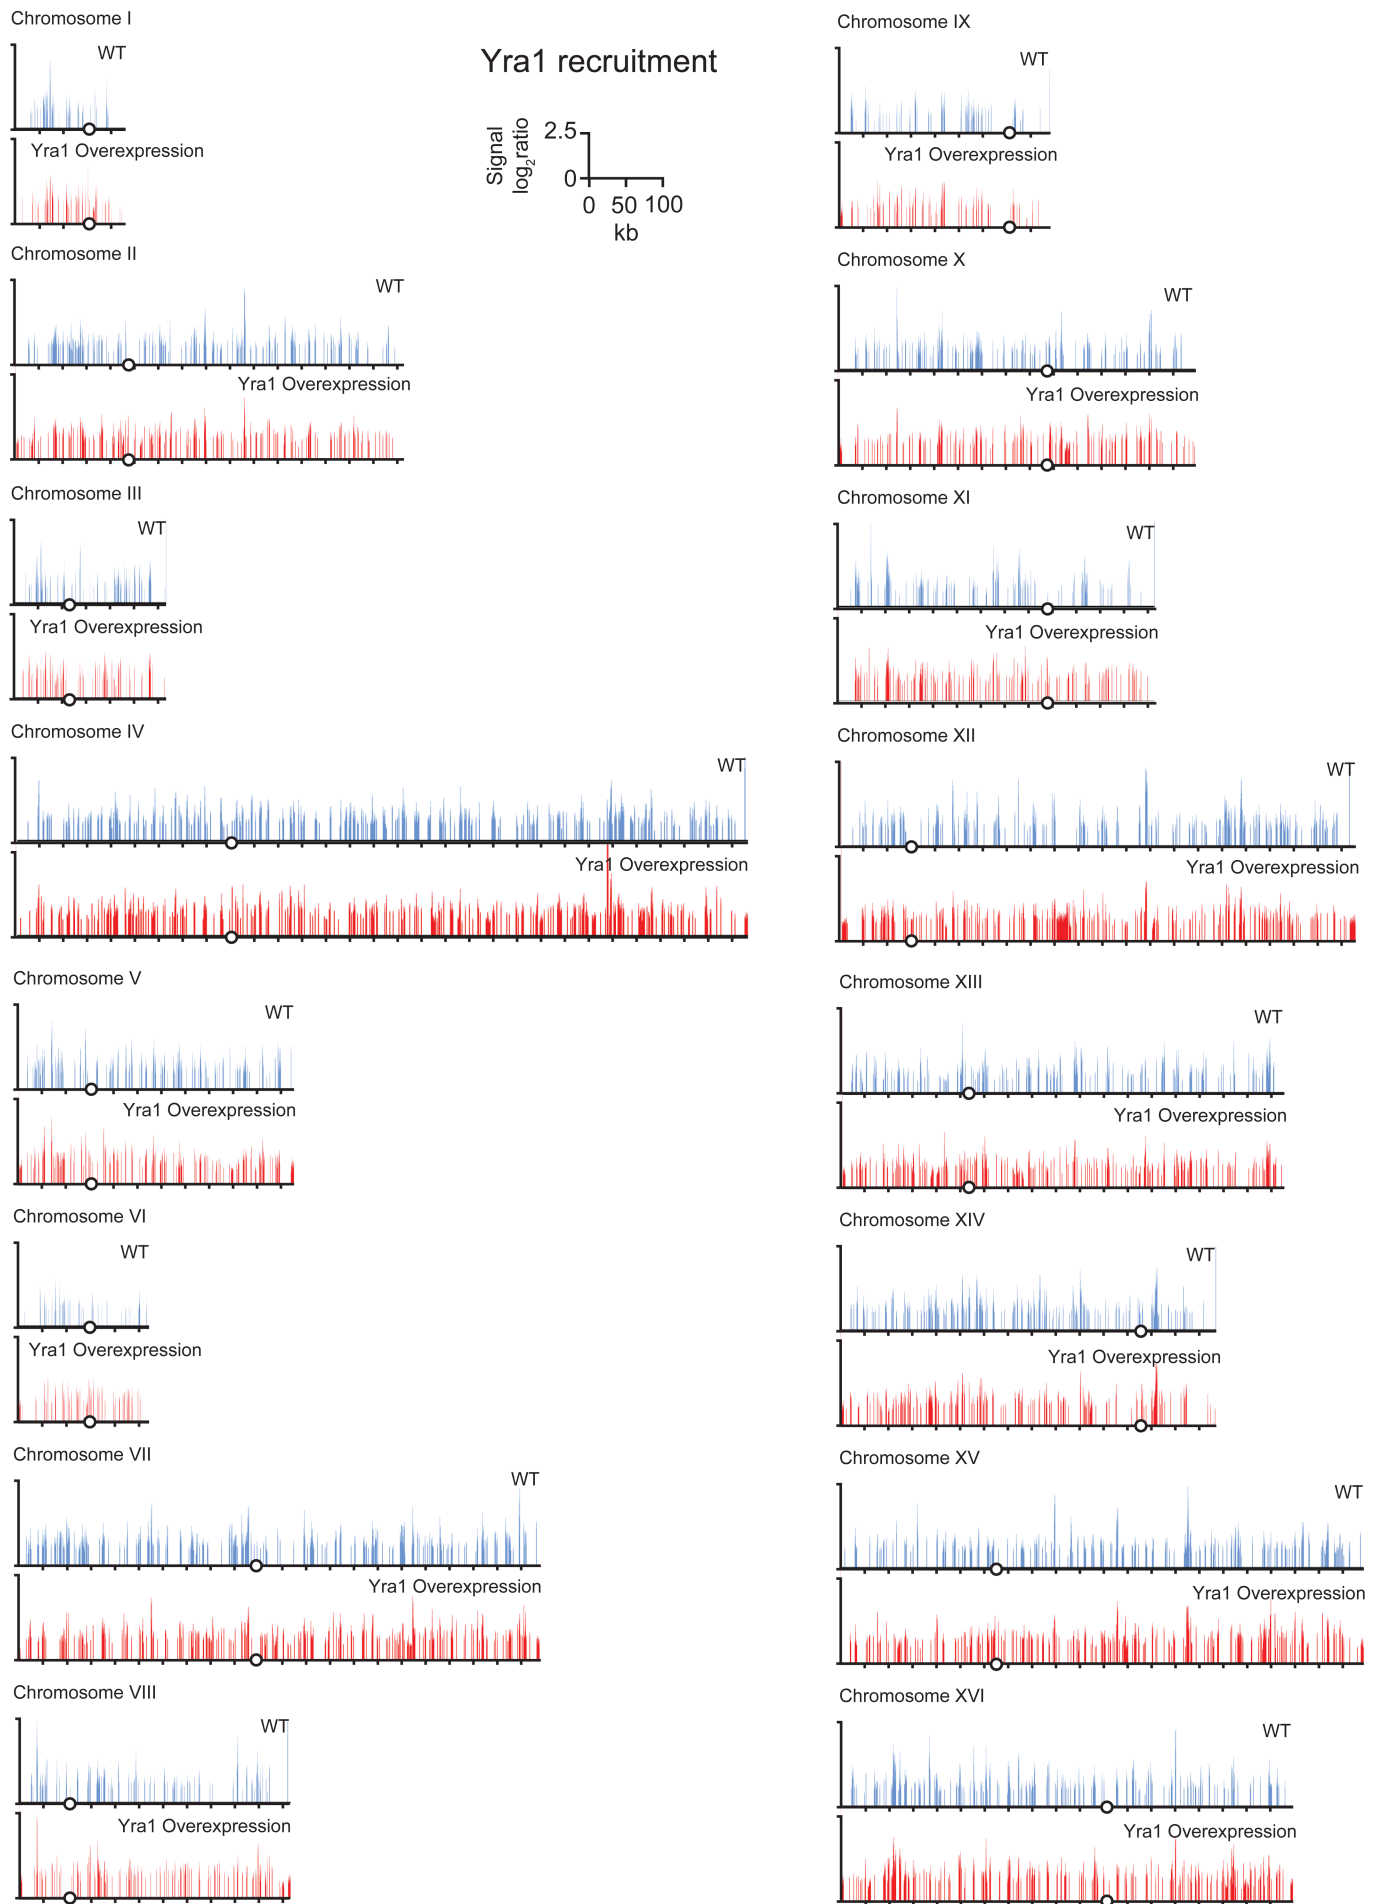

**S5 Figure.** Genomic view of Yra1 recruitment under Yra1 wild-type (HA-YRA1) and Overexpression (HA-YRA1 $\Delta$ ) conditions. A representation of each chromosome with the signal  $\log_2$  ratio values for the significant ChIP-chip clusters is plotted. The X-axis shows chromosomal coordinates in kb. Positions of centromeres are indicated as open circles.
