# Supplementary material for: Excess of Yra1 RNA-Binding Factor Causes Transcription-Dependent Genome Instability, Replication Impairment and Telomere Shortening
Source: PubMed Central journal article supplement (PMC4818039; doi:10.1371/journal.pgen.1005966), 2016-04-01
Supplement: pgen.1005966.s006.pdf [file pgen.1005966.s006.pdf]

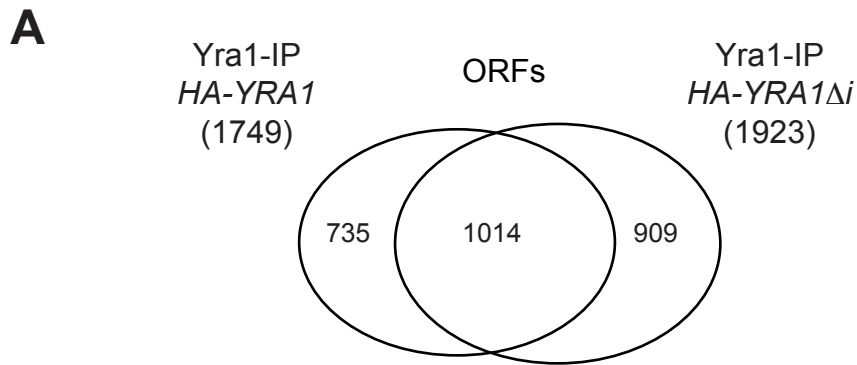

**B**

Yra1-IP Recruitment

|                      | <i>HA-YRA1</i> | <i>HA-YRA1Δi</i> | Total |
|----------------------|----------------|------------------|-------|
| ARS                  | 18             | 20               | 336   |
| Centromeres          | 1              | 2                | 16    |
| Introns              | 22             | 16               | 376   |
| ncRNA                | 2              | 1                | 15    |
| Retrotransposon      | 0              | 39               | 50    |
| Transposable element | 0              | 71               | 89    |
| rRNA                 | 0              | 21               | 27    |
| snoRNA/snRNA         | 22             | 10               | 83    |
| tRNA                 | 7              | 3                | 299   |
| Telomeres            | 20             | 20               | 63    |
| X'Element            | 13             | 2                | 60    |
| Y'Element            | 2              | 18               | 19    |

**S6 Figure. (A)** Venn diagrams showing the overlap between genes sets with significant Yra1 binding in the different CHIP-chip experiments. **(B)** Yra1 cluster distribution at ARSs, centromeres, introns, ncRNA, transposable elements, RNAPIII genes, snoRNA/snRNA and telomeres under wild-type (*HA-YRA1*) and overexpression (*HA-YRA1Δi*) conditions.
