# Supplementary material for: Excess of Yra1 RNA-Binding Factor Causes Transcription-Dependent Genome Instability, Replication Impairment and Telomere Shortening
Source: PubMed Central journal article supplement (PMC4818039; doi:10.1371/journal.pgen.1005966), 2016-04-01
Supplement: pgen.1005966.s008.pdf [file pgen.1005966.s008.pdf]

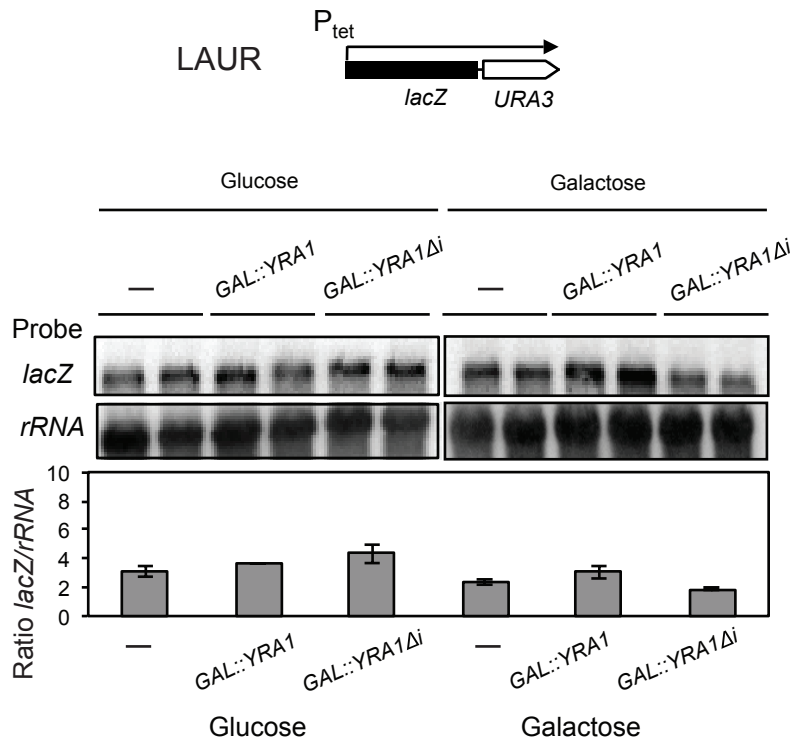

**S8 Figure.** Northern of *lacZ-URA3* system in cells expressing *GAL::YRA1* or *GAL::YRA1Δi*.
