# Supplementary material for: Excess of Yra1 RNA-Binding Factor Causes Transcription-Dependent Genome Instability, Replication Impairment and Telomere Shortening
Source: PubMed Central journal article supplement (PMC4818039; doi:10.1371/journal.pgen.1005966), 2016-04-01
Supplement: pgen.1005966.s009.pdf [file pgen.1005966.s009.pdf]

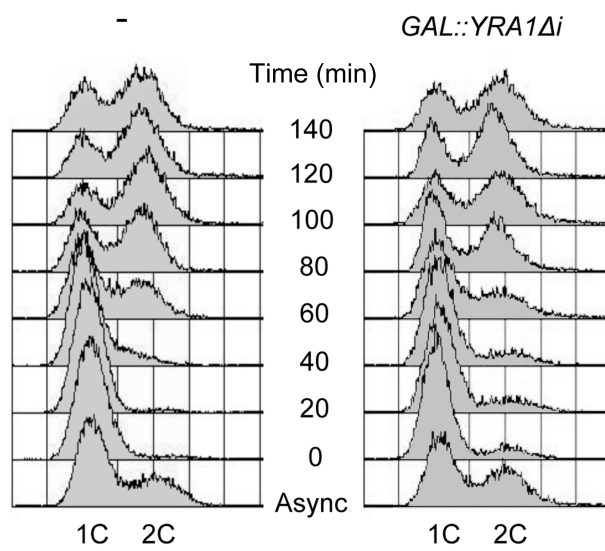

**S9 Figure.** FACS profiles from WT cells transformed with either the *GAL::YRA1Δi* construct or the empty vector. Cells were synchronized in G1 with  $\alpha$ -factor and released at 30°C.
