# Supplementary material for: Excess of Yra1 RNA-Binding Factor Causes Transcription-Dependent Genome Instability, Replication Impairment and Telomere Shortening
Source: PubMed Central journal article supplement (PMC4818039; doi:10.1371/journal.pgen.1005966), 2016-04-01
Supplement: pgen.1005966.s010.pdf [file pgen.1005966.s010.pdf]

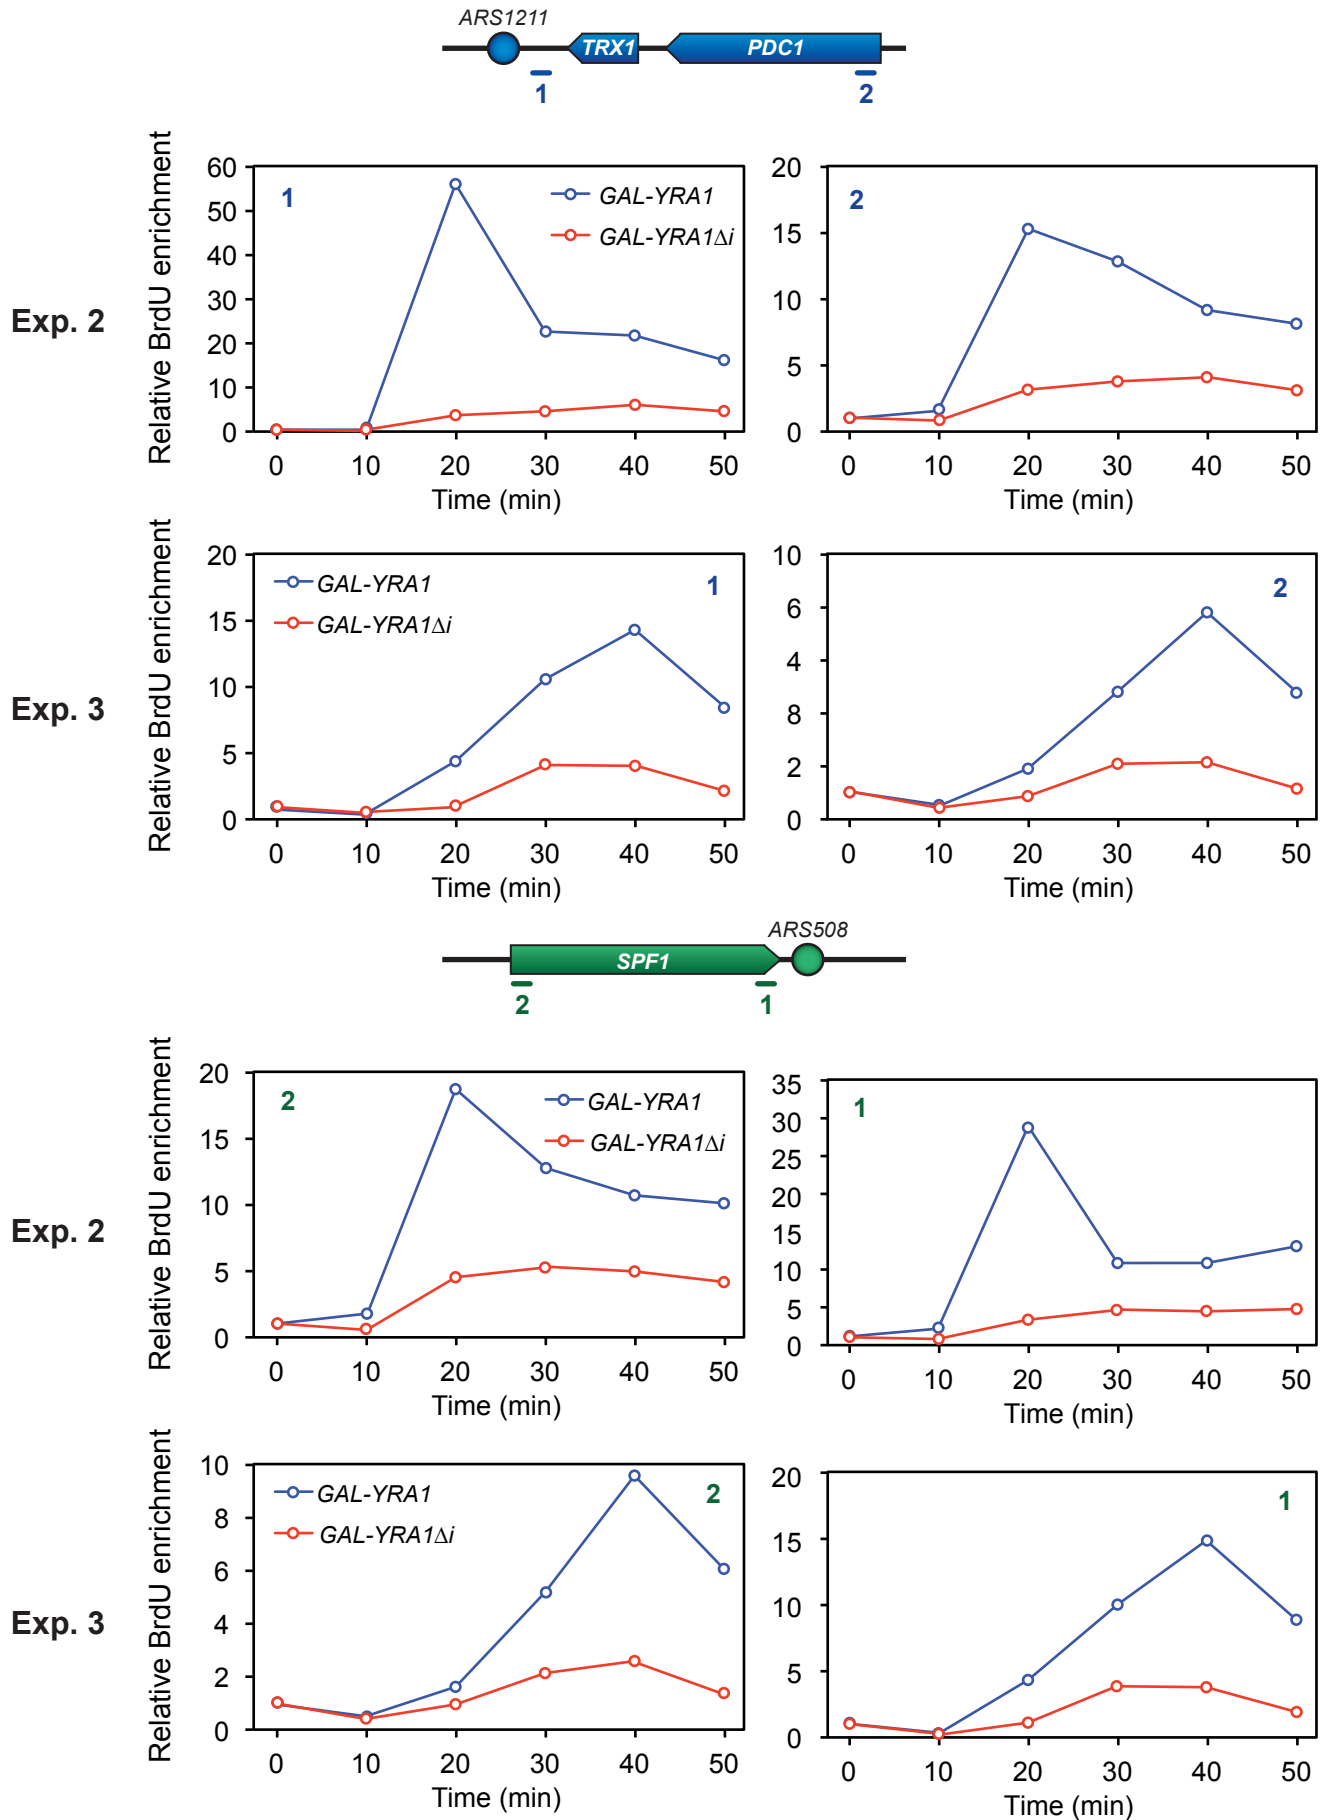

**S10 Figure.** BrdU incorporation analysis for two independent experiments in WRBb-9B (WT) cells overexpressing (*GAL-YRA1*) or not (*GAL-YRA1*) *YRA1*. Other details as in Figure 7.
