# Supplementary material for: Excess of Yra1 RNA-Binding Factor Causes Transcription-Dependent Genome Instability, Replication Impairment and Telomere Shortening
Source: PubMed Central journal article supplement (PMC4818039; doi:10.1371/journal.pgen.1005966), 2016-04-01
Supplement: pgen.1005966.s011.pdf [file pgen.1005966.s011.pdf]

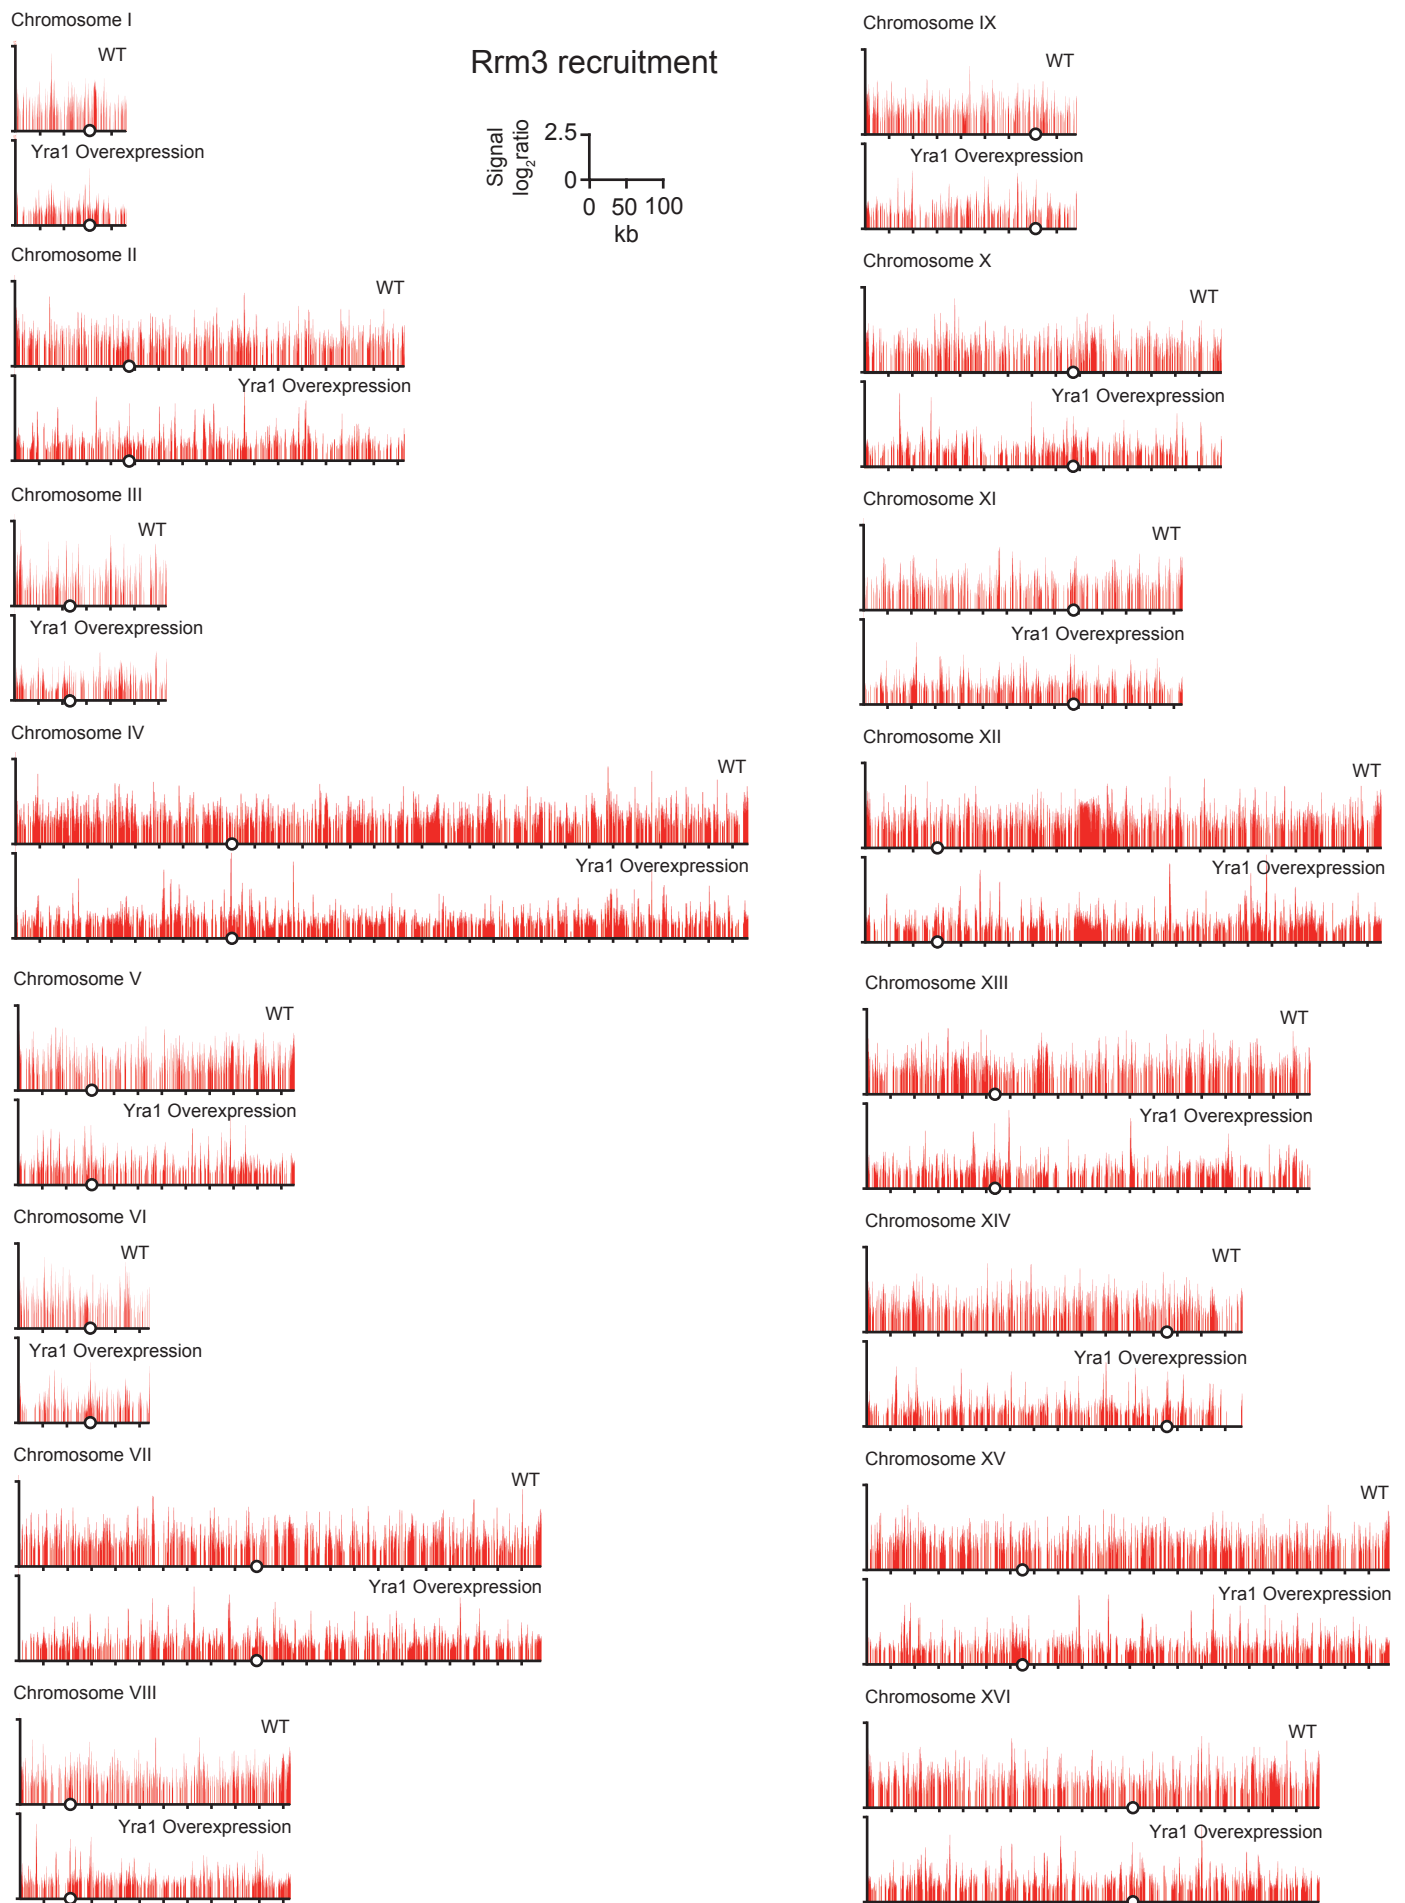

**S11 Figure.** Genomic view of Rm3 recruitment under wild-type (*GAL::YRA1*) and Overexpression (*GAL::YRA1Δi*) conditions. A representation of each chromosome with the signal  $\log_2$  ratio values for the significant Rm3 binding clusters is plotted. The X-axis shows chromosomal coordinates in kb. Centromeres are indicated as open circles.
