# Supplementary material for: Excess of Yra1 RNA-Binding Factor Causes Transcription-Dependent Genome Instability, Replication Impairment and Telomere Shortening
Source: PubMed Central journal article supplement (PMC4818039; doi:10.1371/journal.pgen.1005966), 2016-04-01
Supplement: pgen.1005966.s012.pdf [file pgen.1005966.s012.pdf]

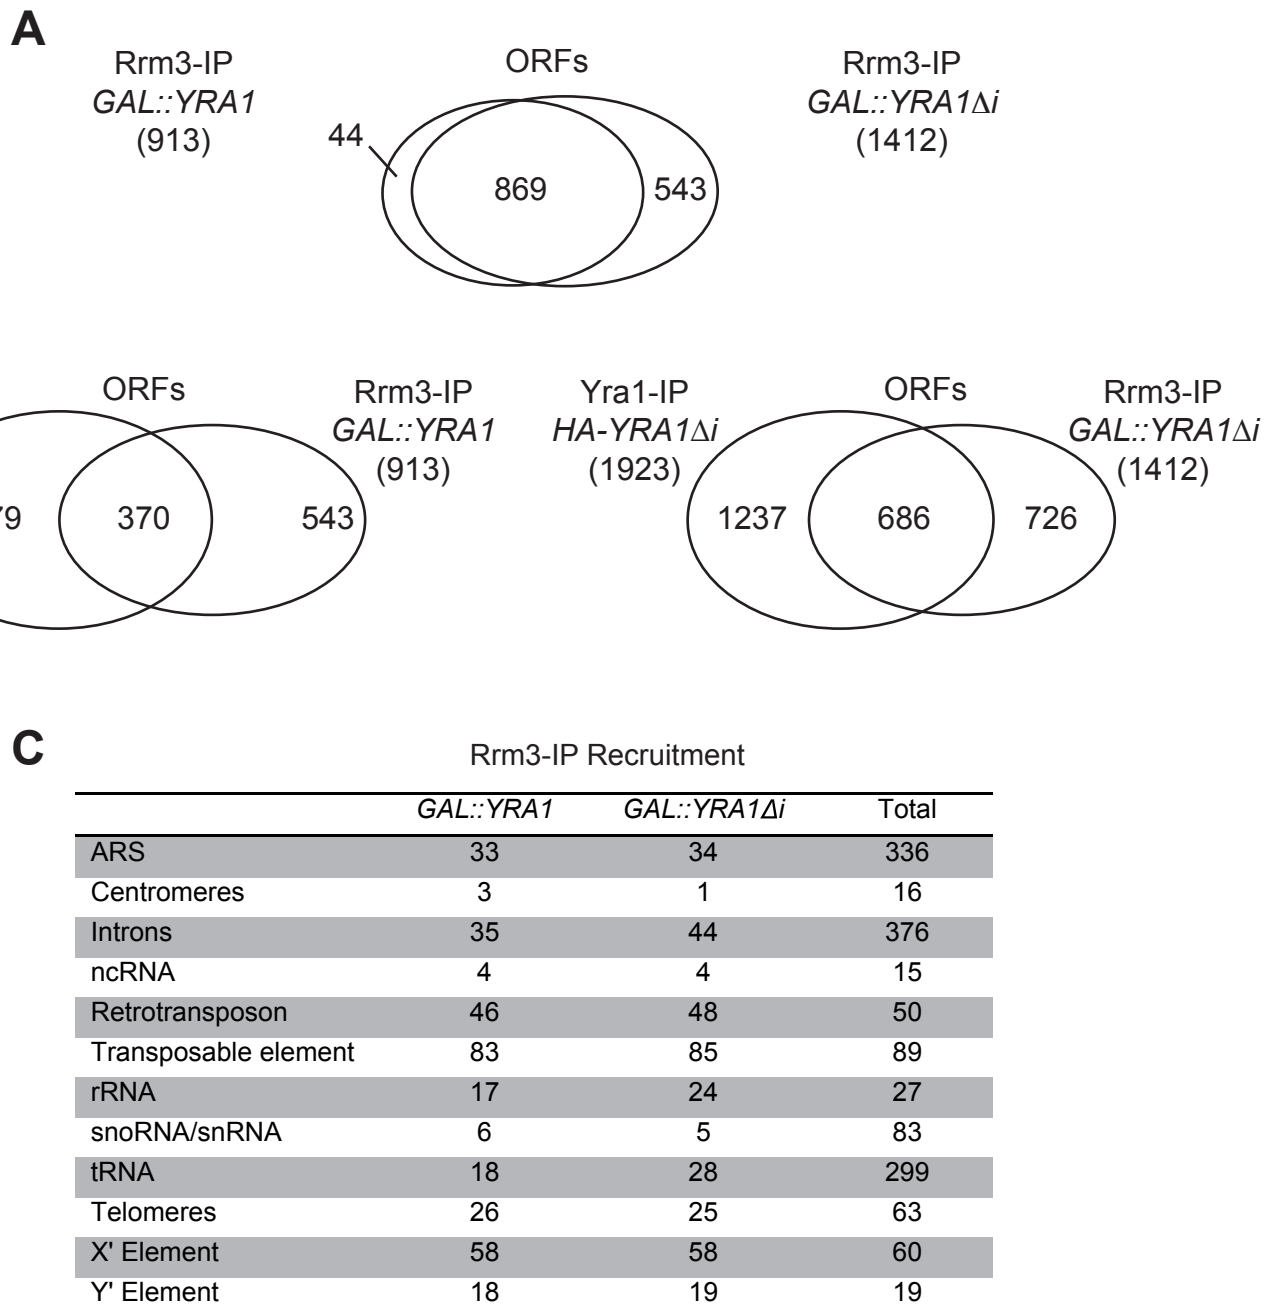

**S12 Figure. (A)** Venn diagrams showing the overlap between genes with significant Rrm3 binding in the different ChIP-chip experiments. **(B)** Venn diagrams showing the overlap between genes with significant Yra1 and Rrm3 binding in different ChIP-chip experiments. **(C)** Rrm3 cluster distribution at ARSs, centromeres, introns, ncRNA, transposable elements, RNAPIII genes, snoRNA/snRNA and telomeres under wild-type (*GAL::YRA1*) and Overexpression (*GAL::YRA1Δi*) conditions.
