# Supplementary material for: Excess of Yra1 RNA-Binding Factor Causes Transcription-Dependent Genome Instability, Replication Impairment and Telomere Shortening
Source: PubMed Central journal article supplement (PMC4818039; doi:10.1371/journal.pgen.1005966), 2016-04-01
Supplement: pgen.1005966.s013.pdf [file pgen.1005966.s013.pdf]

**S1 Table - Genes up- and down-regulated in YRA1-overexpressing cells**

| <b>Up-regulated</b> | <b>Gene name</b> | <b>Fold-change</b> | <b>Down-regulated</b> | <b>Gene name</b> | <b>Fold-change</b> |
|---------------------|------------------|--------------------|-----------------------|------------------|--------------------|
| YAL065C             |                  | 1,578435209        | YBR022W               | CNE1             | 2,192734343        |
| YAR073W             | IMD1             | 1,459980842        | YBR033W               |                  | 1,549425411        |
| YBL051C             | PIN4             | 1,23556803         | YDL079C               |                  | 1,995328085        |
| YBL075C             | SSA3             | 3,941014096        | YDL104C               | POA1             | 1,602812917        |
| YBL078C             | ATG8             | 1,345717144        | YDR031W               | EDS1             | 1,681420248        |
| YBL084C             | CDC27            | 1,257160297        | YDR352W               |                  | 1,601293482        |
| YBR021W             | FUR4             | 1,458655738        | YDR536W               |                  | 2,394386569        |
| YBR072W             | HSP26            | 3,514191943        | YEL057C               |                  | 1,849992835        |
| YBR101C             | FES1             | 1,205077236        | YER018C               |                  | 1,530840918        |
| YBR212W             | NGR1             | 1,305521577        | YGL007C-A             |                  | 1,600752795        |
| YBR219C             |                  | 2,147760534        | YGR041W               |                  | 1,772404792        |
| YBR284W             |                  | 2,448945447        | YGR052W               | NPP1             | 1,54060004         |
| YBR298C-A           |                  | 2,766435286        | YGR249W               | ERP3             | 2,711472488        |
| YBR301W             | PAU24            | 2,60743117         | YHL012W               | PUS9             | 1,931010433        |
| YCR104W             | PAU3             | 2,015599349        | YJL157C               | MRK1             | 1,543886068        |
| YDL020C             | RPN4             | 1,655652589        | YJR131W               | PMT1             | 1,532737646        |
| YDL101C             | DUN1             | 1,273123522        | YJR147W               | QRI7             | 1,728979118        |
| YDL148C             | NOP14            | 1,213605232        | YLR040C               | COS7             | 1,773294957        |
| YDL159W             | STE7             | 1,236264803        | YLR231C               | MIC14            | 1,500839968        |
| YDL168W             | SFA1             | 1,269977075        | YMR316W               | ENA5             | 1,577371746        |
| YDL243C             | AAD4             | 1,572776814        | YMR319C               | RRG1             | 1,603049897        |
| YDL243C             | AAD4             | 1,572776814        | YNL237W               | IPT1             | 1,578220418        |
| YDR027C             | VPS54            | 1,311632155        | YNL259C               | TMN2             | 1,716408551        |
| YDR034C-A           |                  | 1,316834534        | YNR067C               | FIN1             | 1,722433199        |
| YDR042C             |                  | 1,995260777        | YOR034C-A             | GTB1             | 1,51085649         |
| YDR054C             | CDC34            | 1,218281749        | YOR071C               |                  | 1,510084483        |
| YDR082W             | STN1             | 1,208704553        | YOR313C               | DAD4             | 1,59711223         |
| YDR146C             | SWI5             | 1,345733216        | YPL014W               |                  | 2,065046715        |
| YDR171W             | HSP42            | 1,583744277        | YPL040C               |                  | 1,502009699        |
| YDR173C             | ARG82            | 1,329642942        |                       |                  |                    |
| YDR182W-A           |                  | 1,973174585        |                       |                  |                    |
| YDR195W             | REF2             | 1,253686039        |                       |                  |                    |
| YDR207C             | UME6             | 1,213317613        |                       |                  |                    |
| YDR218C             | SPR28            | 2,070083917        |                       |                  |                    |
| YDR228C             | PCF11            | 1,265773811        |                       |                  |                    |
| YDR246W-A           |                  | 1,660363817        |                       |                  |                    |
| YDR256C             | CTA1             | 1,552289033        |                       |                  |                    |
| YDR259C             | YAP6             | 1,533181626        |                       |                  |                    |
| YDR273W             | DON1             | 1,39027791         |                       |                  |                    |
| YDR381W             | YRA1             | 2,295770626        |                       |                  |                    |
| YDR386W             | MUS81            | 1,393126378        |                       |                  |                    |
| YDR402C             | DIT2             | 1,638890844        |                       |                  |                    |
| YDR446W             | ECM11            | 2,01141839         |                       |                  |                    |
| YDR501W             | PLM2             | 1,416973872        |                       |                  |                    |
| YDR522C             | SPS2             | 1,544438009        |                       |                  |                    |
| YDR523C             | SPS1             | 2,265912181        |                       |                  |                    |
| YEL023C             |                  | 1,355512312        |                       |                  |                    |
| YEL069C             | HXT13            | 2,128119871        |                       |                  |                    |
| YEL069C             | HXT13            | 2,128119871        |                       |                  |                    |

|           |        |             |
|-----------|--------|-------------|
| YEL070W   | DSF1   | 1,716610964 |
| YER004W   | FMP52  | 1,385595536 |
| YER021W   | RPN3   | 1,241063759 |
| YER060W-A | FCY22  | 1,384573761 |
| YER078W-A |        | 1,616274216 |
| YER096W   | SHC1   | 1,932587938 |
| YER103W   | SSA4   | 2,208849348 |
| YER106W   | MAM1   | 2,32836134  |
| YER173W   | RAD24  | 1,409221147 |
| YER179W   | DMC1   | 1,465579752 |
| YFL014W   | HSP12  | 1,221975279 |
| YFL033C   | RIM15  | 1,421222297 |
| YFL053W   | DAK2   | 1,84896569  |
| YFL056C   | AAD6   | 3,877264063 |
| YFR010W   | UBP6   | 1,286107439 |
| YFR027W   | ECO1   | 1,438652261 |
| YFR032C   | RRT5   | 4,665553667 |
| YFR050C   | PRE4   | 1,216988175 |
| YFR057W   |        | 2,236420654 |
| YGL062W   | PYC1   | 1,404961916 |
| YGL073W   | HSF1   | 1,234234475 |
| YGL116W   | CDC20  | 1,215873602 |
| YGL122C   | NAB2   | 1,30589786  |
| YGL163C   | RAD54  | 1,31790056  |
| YGL175C   | SAE2   | 1,504650658 |
| YGL176C   |        | 1,2513952   |
| YGL244W   | RTF1   | 1,254550668 |
| YGR002C   | SWC4   | 1,212810758 |
| YGR035C   |        | 4,92461551  |
| YGR048W   | UFD1   | 1,467574776 |
| YGR059W   | SPR3   | 1,402212173 |
| YGR142W   | BTN2   | 2,590458726 |
| YGR146C-A |        | 2,08999086  |
| YGR180C   | RNR4   | 1,250125491 |
| YGR211W   | ZPR1   | 1,282257369 |
| YGR223C   | HSV2   | 1,284843997 |
| YGR238C   | KEL2   | 1,280349965 |
| YGR286C   | BIO2   | 1,48924861  |
| YHL016C   | DUR3   | 1,65650195  |
| YHR007C-A |        | 3,523748982 |
| YHR014W   | SPO13  | 1,74240177  |
| YHR021W-A | ECM12  | 1,805067009 |
| YHR027C   | RPN1   | 1,311531867 |
| YHR075C   | PPE1   | 1,195033629 |
| YHR079C-A | SAE3   | 3,017197723 |
| YHR086W-A |        | 1,331873949 |
| YHR157W   | REC104 | 1,625128364 |
| YHR179W   | OYE2   | 1,452933804 |
| YHR185C   | PFS1   | 1,255210996 |
| YHR216W   | IMD2   | 1,372140463 |
| YIL038C   | NOT3   | 1,193594375 |
| YIL107C   | PFK26  | 1,382672332 |
| YIL143C   | SSL2   | 1,612736964 |

|           |        |             |
|-----------|--------|-------------|
| YIL144W   | TID3   | 1,285953873 |
| YIR013C   | GAT4   | 2,326727444 |
| YJL110C   | GZF3   | 1,28640183  |
| YJL218W   |        | 1,294918093 |
| YJL219W   | HXT9   | 1,4505375   |
| YJL219W   | HXT9   | 1,4505375   |
| YJR005C-A |        | 4,716371824 |
| YJR010W   | MET3   | 1,497305677 |
| YJR047C   | ANB1   | 1,317594077 |
| YJR120W   |        | 1,777045244 |
| YKL043W   | PHD1   | 1,381858124 |
| YKL070W   |        | 3,079053451 |
| YKL106C-A |        | 1,577013025 |
| YKL125W   | RRN3   | 1,595309567 |
| YKL221W   | MCH2   | 1,62327449  |
| YKR071C   | DRE2   | 1,230066549 |
| YKR093W   | PTR2   | 1,342653502 |
| YLL046C   | RNP1   | 4,431333065 |
| YLL060C   | GTT2   | 1,724233613 |
| YLL064C   | PAU18  | 1,570319742 |
| YLL066W-B |        | 1,272501939 |
| YLR012C   |        | 2,771255448 |
| YLR109W   | AHP1   | 1,453344474 |
| YLR134W   | PDC5   | 1,328941218 |
| YLR137W   | RKM5   | 1,387764011 |
| YLR216C   | CPR6   | 1,34050033  |
| YLR225C   |        | 1,296285889 |
| YLR329W   | REC102 | 1,811832488 |
| YLR343W   | GAS2   | 1,582433131 |
| YLR362W   | STE11  | 1,30378304  |
| YLR363C   | NMD4   | 1,306679674 |
| YLR376C   | PSY3   | 1,364118101 |
| YLR406C-A |        | 1,475927985 |
| YLR424W   | SPP382 | 1,22700485  |
| YLR431C   | ATG23  | 1,36681754  |
| YLR433C   | CNA1   | 1,287146427 |
| YLR460C   |        | 3,662355029 |
| YLR461W   | PAU4   | 2,658244684 |
| YML007W   | YAP1   | 1,57652901  |
| YML032C   | RAD52  | 1,336978538 |
| YML043C   | RRN11  | 1,304361484 |
| YML058W-A | HUG1   | 5,109115552 |
| YML100W-A |        | 1,281395482 |
| YML112W   | CTK3   | 1,183120151 |
| YMR004W   | MVP1   | 1,204450417 |
| YMR065W   | KAR5   | 1,273756958 |
| YMR067C   | UBX4   | 1,296766234 |
| YMR175W   | SIP18  | 3,147689806 |
| YMR177W   | MMT1   | 1,502935715 |
| YMR180C   | CTL1   | 1,25893974  |
| YMR191W   | SPG5   | 1,367817774 |
| YMR192W   | GYL1   | 1,259295248 |
| YMR242W-A |        | 1,614890948 |

|           |        |             |
|-----------|--------|-------------|
| YMR276W   | DSK2   | 1,233497011 |
| YNL036W   | NCE103 | 1,546282657 |
| YNL064C   | YDJ1   | 1,224556992 |
| YNL130C-A | DGR1   | 1,409548268 |
| YNL155W   |        | 1,489073652 |
| YNL251C   | NRD1   | 1,570907974 |
| YNR062C   |        | 1,574928499 |
| YOL017W   | ESC8   | 1,304622366 |
| YOL019W-A |        | 1,389421109 |
| YOL024W   |        | 1,557217077 |
| YOL045W   | PSK2   | 1,350289268 |
| YOL047C   |        | 1,549745653 |
| YOL123W   | HRP1   | 1,555998535 |
| YOL149W   | DCP1   | 1,594326141 |
| YOL151W   | GRE2   | 2,338653446 |
| YOL156W   | HXT11  | 1,728760358 |
| YOL162W   |        | 1,749575379 |
| YOR008C-A |        | 1,250658534 |
| YOR009W   | TIR4   | 1,431386551 |
| YOR023C   | AHC1   | 1,547619656 |
| YOR027W   | STI1   | 1,275107079 |
| YOR068C   | VAM10  | 1,678161706 |
| YOR076C   | SKI7   | 1,275368874 |
| YOR161C-C |        | 2,424216161 |
| YOR177C   | MPC54  | 1,260820574 |
| YOR183W   | FYV12  | 1,760073686 |
| YOR186W   |        | 1,891052844 |
| YOR214C   |        | 2,809221299 |
| YOR237W   | HES1   | 2,875337587 |
| YOR242C   | SSP2   | 2,573960153 |
| YOR357C   | SNX3   | 1,197915415 |
| YOR387C   |        | 1,34367537  |
| YOR394W   | PAU21  | 1,725633241 |
| YPL021W   | ECM23  | 1,65648015  |
| YPL027W   | SMA1   | 2,191932184 |
| YPL041C   |        | 1,631172814 |
| YPL051W   | ARL3   | 1,396650058 |
| YPL054W   | LEE1   | 1,494397907 |
| YPL130W   | SPO19  | 6,040213285 |
| YPL153C   | RAD53  | 1,282117844 |
| YPL164C   | MLH3   | 1,502553874 |
| YPL169C   | MEX67  | 1,227746924 |
| YPL171C   | OYE3   | 3,543445069 |
| YPL192C   | PRM3   | 1,300000302 |
| YPL240C   | HSP82  | 1,370412039 |
| YPL245W   |        | 1,479561904 |
| YPL255W   | BBP1   | 1,238011804 |
| YPR025C   | CCL1   | 1,252478415 |
| YPR158W   | CUR1   | 1,515126588 |
| YPR192W   | AQY1   | 1,512225924 |
