# Supplementary material for: Excess of Yra1 RNA-Binding Factor Causes Transcription-Dependent Genome Instability, Replication Impairment and Telomere Shortening
Source: PubMed Central journal article supplement (PMC4818039; doi:10.1371/journal.pgen.1005966), 2016-04-01
Supplement: pgen.1005966.s014.pdf [file pgen.1005966.s014.pdf]

**Table S2.** Yeast strains used in this study.

| Source            | Genotype                                                                                        | Source       |
|-------------------|-------------------------------------------------------------------------------------------------|--------------|
| AYW3-1B           | <i>MATa ade2 can1-100 his3 leu2-3,112 leu2-k::ADE2-URA3::leu2-k trp1-1 ura3-1 rad5-G35R</i>     | [1]          |
| A3Y3A             | <i>MATa ura3 ade2 his3leu2k::URA3-ADE2::leu2k</i>                                               | [2]          |
| BY4741            | <i>MATa his3Δ1 leu2Δ0 met15Δ ura3Δ0</i>                                                         | Euroscarf    |
| Y06401            | BY4741 <i>rad51Δ::KanMX</i>                                                                     | Euroscarf    |
| Y00540            | BY4741 <i>rad52Δ::KanMX</i>                                                                     | Euroscarf    |
| Y03576            | BY4741 <i>rad9Δ::KanMX</i>                                                                      | Euroscarf    |
| Y04222            | BY4741 <i>mus81Δ::KanMX</i>                                                                     | Euroscarf    |
| Y00775            | BY4741 <i>sgs1Δ::KanMX</i>                                                                      | Euroscarf    |
| Y01331            | BY4741 <i>srs2Δ::KanMX</i>                                                                      | Euroscarf    |
| W303-1A           | <i>MATa ade2-1 can1-100 his3-11,15 leu2-3,112 trp1-1 ura3-1 rad5-G535R</i>                      | R. Rothstein |
|                   | W303-1A <i>sml1Δ::URA3</i>                                                                      | J.A. Tercero |
| YJT75             | W303-1A <i>sml1Δ::URA3 rad53Δ::LEU2</i>                                                         | J.A. Tercero |
| DD303             | W303-1A <i>elg1Δ::KanMX</i>                                                                     | [3]          |
| DD377             | W303-1A <i>ctf18Δ::KanMX</i>                                                                    | [3]          |
| DD379             | W303-1A <i>rad24Δ::KanMX</i>                                                                    | [3]          |
| YLL134            | W303-1A <i>mec3Δ::TRP1</i>                                                                      | [4]          |
| DKY194            | W303-1A <i>dia2Δ::KanMX</i>                                                                     | [5]          |
| AMH4              | <i>MAT a pol30-52 ade3::GAL::HO</i>                                                             | [6]          |
| WRBb-9B           | <i>MATa ade2-1 bar1Δ can1-100 his3-11,15 leu2-3,112 RRM3::FLAG::KanMX ura3::URA3/GPD-Tk(7x)</i> | [7]          |
| YRA1 shuffle      | <i>MATa,ade2,his3,leu2,trp1,ura3,yra1::HIS3 (pRS316-YRA1)</i>                                   | [8]          |
| <i>yra1-1</i>     | <i>MATa,ade2,his3,leu2,trp1,ura3,yra1::HIS3 (pRS314-yra1-1)</i>                                 | [8]          |
| <i>YRA1Δi</i>     | <i>MATa,ade2,his3,leu2,trp1,ura3,yra1::HIS3 (pHA-YRA1Δi)</i>                                    | [9]          |
| <i>YRA1ΔRBDΔi</i> | <i>MATa,ade2,his3,leu2,trp1,ura3,yra1::HIS3 (pHA-YRA1ΔRBD)</i>                                  | [9]          |
| U678-4C           | W303-1B <i>hpr1Δ::HIS3</i>                                                                      | [10]         |

1. Piruat JI, Aguilera A (1996) Mutations in the yeast SRB2 general transcription factor suppress hpr1-induced recombination and show defects in DNA repair. *Genetics* 143: 1533-1542.
2. Aguilera A, Klein HL (1990) HPR1, a novel yeast gene that prevents intrachromosomal excision recombination, shows carboxy-terminal homology to the *Saccharomyces cerevisiae* TOP1 gene. *Mol Cell Biol* 10: 1439-1451.
3. Kanellis P, Agyei R, Durocher D (2003) Elg1 forms an alternative PCNA-interacting RFC complex required to maintain genome stability. *Curr Biol* 13: 1583-1595.
4. Giannattasio M, Sommariva E, Vercillo R, Lippi-Boncambi F, Liberi G, et al. (2002) A dominant-negative MEC3 mutant uncovers new functions for the Rad17 complex and Tel1. *Proc Natl Acad Sci U S A* 99: 12997-13002.
5. Swaminathan S, Kile AC, MacDonald EM, Koepf DM (2007) Yra1 is required for S phase entry and affects Dia2 binding to replication origins. *Mol Cell Biol* 27: 4674-4684.

6. Holmes AM, Haber JE (1999) Double-strand break repair in yeast requires both leading and lagging strand DNA polymerases. *Cell* 96: 415-424.
7. Santos-Pereira JM, Herrero AB, Garcia-Rubio ML, Marin A, Moreno S, et al. (2013) The Npl3 hnRNP prevents R-loop-mediated transcription-replication conflicts and genome instability. *Genes Dev* 27: 2445-2458.
8. Strasser K, Hurt E (2000) Yra1p, a conserved nuclear RNA-binding protein, interacts directly with Mex67p and is required for mRNA export. *Embo J* 19: 410-420.
9. Zenklusen D, Vinciguerra P, Strahm Y, Stutz F (2001) The yeast hnRNP-Like proteins Yra1p and Yra2p participate in mRNA export through interaction with Mex67p. *Mol Cell Biol* 21: 4219-4232.
10. Piruat JI, Aguilera A (1998) A novel yeast gene, THO2, is involved in RNA pol II transcription and provides new evidence for transcriptional elongation-associated recombination. *EMBO J* 17: 4859-4872.
