# Supplementary material for: Excess of Yra1 RNA-Binding Factor Causes Transcription-Dependent Genome Instability, Replication Impairment and Telomere Shortening
Source: PubMed Central journal article supplement (PMC4818039; doi:10.1371/journal.pgen.1005966), 2016-04-01
Supplement: pgen.1005966.s015.pdf [file pgen.1005966.s015.pdf]

**Table S3.** Primers used in this study.

| <b>Primers</b>      | <b>Sequence (5'-3')</b>             |
|---------------------|-------------------------------------|
| sYRA1up             | GAAGTAATAGAGCCCGTGTC                |
| sYRA1low            | AAACCTTCGACGTTGACCTT                |
| YRAclon up          | ATCATTATGGATCCGACCTACATCTGCTAAATGTC |
| YRAclon low         | CACAACGACTGCAGTTAAATCAAACAAAAAATTG  |
| rDNA up             | TTGGAGAGGGCAACTTTGG                 |
| rDNA low            | CAGGATCGGTCGATTGTGC                 |
| Telom up            | TGCCGTGCAACAAACACTAAATCAA           |
| Telom low           | CGCTCGAGAAAGTTGGAGTTTTTCA           |
| TLC1up              | TAAGGTGACAGAAAAAAGG                 |
| TLC1low             | AACCATCTTGAAAAATCTCA                |
| <b>qPCR primers</b> | <b>Sequence (5'-3')</b>             |
| 18S F               | CGATCCCTAGTCGGCATAGT                |
| 18S R               | GAGGTGAAATTCTTGGATTTATTG            |
| PMA1 F              | ATCGCTATTTTCGCTGATGTTG              |
| PMA1 R              | CGGGCTTTGGAGAGTAAGGA                |
| ts(AGA)J F          | AGTGGTTAAGGCGAAAGATTAGAAAT          |
| ts(AGA)J R          | GACAACCTGCAGGACTCGAACCT             |
| IME1 F              | GATATGCTGCGGCTTACTCCTT              |
| IME1 R              | ATTTCTTGAAACCTGACCTTGTCAT           |
| ARS1211-1 S         | GTTTCCTCCACCTCCTTTGTGT              |
| ARS1211-1 AS        | TGACCGATATATTGTGTTTCTATACTGTGT      |
| ARS1211-2 S         | CGTTCAATTCGTTGGCGTTAC               |
| ARS1211-2 AS        | TTAACACCGTTTTTCGGTTTGC              |
| ARS508-1 S          | CCCGTGGTAAACCTTTAGAAAAAC            |
| ARS508-1 AS         | ATATGAACGGCAAATTGAGACAAA            |
| ARS508-2 S          | AGTCATTAATAGCAAAGCCGTACGT           |
| ARS508-2 AS         | GGTCCTTTGATGTAACGATCATATTG          |
